# Supplementary material for: Urine NMR Metabolomics for Precision Oncology in Colorectal Cancer
Source: Int J Mol Sci. 2022 Sep 22;23(19):11171. doi: 10.3390/ijms231911171 (PMC9569997; doi:10.3390/ijms231911171)
Supplement: Supplementary file 1 [file ijms-23-11171-s001.zip › NMR_CRC_compounds_vRevisions.xlsx]

## Sheet: captions
Table	Caption
Table S1	Identified compounds from the systematic review (qualitative analysis) of selected studies. The asterisk * indicates the study was used in the meta-analysis (quantitative analysis).
Table S2	Cohort information about body mass index (BMI) and smoking history from the systematic review (quantitative analysis) of selected studies. Only studies with disclosed information on these variables are shown.
Table S3	Quality assessment data from the systematic review (qualitative analysis) of selected studies. LB: low bias (complete information), HB: high bias (no complete information), U: undefined (no information disclosed). Ordered by type of study and then by reference.
Table S4	Behavior of the identified compounds reported in the systematic review (qualitative analysis) of selected studies. (a) With respect to healthy controls, (b) polyps hyperplastics and adenomas and CRC vs. normal, (c) CRC pre-surgery vs. post-surgery, (d) with respect to other cancer types, (e) CRC post-surgery vs. healthy controls, (f) post-chemotherapy vs. healthy controls, (g) CRC pre-surgery vs.…
Table S5	Meta-analysis vote-counting results of the comparison between colorectal cancer patients and health patients.
Table S6	Meta-analysis vote-counting results of the comparison between pre-surgery samples and post-surgery samples.
Table S7	Summary of meta-analysis vote-counting results of all analyzed groups.

## Sheet: references
Short reference	Long reference	Metasearcher(s)
Wang Z et al., 2017	Wang Z, Lin Y, Liang J, Huang Y, Ma C, Liu X, Yang J. NMR-based metabolomic techniques identify potential urinary biomarkers for early colorectal cancer detection. Oncotarget. 2017 Nov 11;8(62):105819-105831. doi: 10.18632/oncotarget.22402. PMID: 29285295; PMCID: PMC5739682.	Scopus
Liesenfeld DB et al., 2015	Liesenfeld DB, Habermann N, Toth R, Owen RW, Frei E, Staffa J, Schrotz-King P, Klika KD, Ulrich CM. Changes in urinary metabolic profiles of colorectal cancer patients enrolled in a prospective cohort study (ColoCare). Metabolomics. 2015 Aug;11(4):998-1012. doi: 10.1007/s11306-014-0758-3. Epub 2014 Dec 20. PMID: 29250455; PMCID: PMC5730072.	Scopus, WoS
Deng L et al., 2017a	Deng L, Chang D, Foshaug RR, Eisner R, Tso VK, Wishart DS, Fedorak RN. Development and Validation of a High-Throughput Mass Spectrometry Based Urine Metabolomic Test for the Detection of Colonic Adenomatous Polyps. Metabolites. 2017 Jun 22;7(3):32. doi: 10.3390/metabo7030032. PMID: 28640228; PMCID: PMC5618317.	Scopus
Deng L et al., 2017b	Deng L, Fang H, Tso VK, Sun Y, Foshaug RR, Krahn SC, Zhang F, Yan Y, Xu H, Chang D, Zhang Y, Fedorak RN. Clinical validation of a novel urine-based metabolomic test for the detection of colonic polyps on Chinese population. Int J Colorectal Dis. 2017 May;32(5):741-743. doi: 10.1007/s00384-016-2729-9. Epub 2016 Dec 1. PMID: 27909808.	PubMed, Scopus
Wang H et al., 2014	Wang H, Tso V, Wong C, Sadowski D, Fedorak RN. Development and validation of a highly sensitive urine-based test to identify patients with colonic adenomatous polyps. Clin Transl Gastroenterol. 2014 Mar 20;5(3):e54. doi: 10.1038/ctg.2014.2. PMID: 24646506; PMCID: PMC3940838.	Scopus
Kim ER et al., 2019	Kim ER, Kwon HN, Nam H, Kim JJ, Park S, Kim YH. Urine-NMR metabolomics for screening of advanced colorectal adenoma and early stage colorectal cancer. Sci Rep. 2019 Mar 18;9(1):4786. doi: 10.1038/s41598-019-41216-y. PMID: 30886205; PMCID: PMC6423046.	PubMed, Scopus
Li Z et al., 2022	Li Z, Deng X, Luo J, Lei Y, Jin X, Zhu J, Lv G. Metabolomic Comparison of Patients With Colorectal Cancer at Different Anticancer Treatment Stages. Front Oncol. 2022 Feb 4;11:574318. doi: 10.3389/fonc.2021.574318. PMID: 35186705; PMCID: PMC8855116.	Scopus
Ose J et al., 2019	Ose J, Gigic B, Lin T, Liesenfeld DB, Böhm J, Nattenmüller J, Scherer D, Zielske L, Schrotz-King P, Habermann N, Ochs-Balcom HM, Peoples AR, Hardikar S, Li CI, Shibata D, Figueiredo J, Toriola AT, Siegel EM, Schmit S, Schneider M, Ulrich A, Kauczor HU, Ulrich CM. Multiplatform Urinary Metabolomics Profiling to Discriminate Cachectic from Non-Cachectic Colorectal Cancer Patients: Pilot Results fro…	Scopus, WoS
Eisner R et al., 2013	Eisner R, Greiner R, Tso V, Wang H, Fedorak RN. A machine-learned predictor of colonic polyps based on urinary metabolomics. Biomed Res Int. 2013;2013:303982. doi: 10.1155/2013/303982. Epub 2013 Nov 7. PMID: 24307992; PMCID: PMC3838851.	PubMed, Scopus
Delphan M et al., 2018	Delphan M, Lin T, Liesenfeld DB, Nattenmüller J, Böhm JT, Gigic B, Habermann N, Zielske L, Schrotz-King P, Schneider M, Ulrich A, Kauczor HU, Ulrich CM, Ose J. Associations of branched-chain amino acids with parameters of energy balance and survival in colorectal cancer patients: Results from the ColoCare Study. Metabolomics. 2018 Mar;2018(14):22. doi: 10.1007/s11306-017-1314-8. Epub 2018 Jan 31.…	WoS

## Sheet: Table S1
#	Common Name	MW	Chemical formula	InChIKey	PubChem ID	HMDB ID	KEGG ID	Canonical SMILES	CAS #	Kingdom	Supraclass	Superclass	Class	Subclass	No. Studies	Reference	Country/ies
1	Acetone	58.08	C3H6O	CSCPPACGZOOCGX-UHFFFAOYSA-N	180	HMDB0001659	C00207	CC(=O)C	67-64-1	Organic compounds	Organic oxygen compounds	Organooxygen compounds	Carbonyl compounds	Ketones	3	(Eisner R et al., 2013)(Li Z et al., 2022)(Ose J et al., 2019)	CA, CN, DE
2	Carnitine	161.2	C7H15NO3	PHIQHXFUZVPYII-UHFFFAOYSA-N	288	HMDB0000062	C00318	C[N+](C)(C)CC(CC(=O)[O-])O	406-76-8	Organic compounds	Organic nitrogen compounds	Organonitrogen compounds	Quaternary ammonium salts	Carnitines	3	(Deng L et al., 2017a)(Li Z et al., 2022)(Liesenfeld DB et al., 2015)	CA, CN, DE
3	Creatinine	113.12	C4H7N3O	DDRJAANPRJIHGJ-UHFFFAOYSA-N	588	HMDB0000562	C00791	CN1CC(=O)N=C1N	60-27-5	Organic compounds	Organic acids and derivatives	Carboxylic acids and derivatives	Amino acids, peptides, and analogues	Amino acids and derivatives	3	(Kim ER et al., 2019)(Li Z et al., 2022)(Wang Z et al., 2017)	CN, CN, KR
4	L-Alanine	89.09	C3H7NO2	QNAYBMKLOCPYGJ-REOHCLBHSA-N	5950	HMDB0000161	C00041	CC(C(=O)O)N	115967-49-2	Organic compounds	Organic acids and derivatives	Carboxylic acids and derivatives	Amino acids, peptides, and analogues	Amino acids and derivatives	3	(Kim ER et al., 2019)(Li Z et al., 2022)(Wang Z et al., 2017)	CN, CN, KR
5	L-Isoleucine	131.17	C6H13NO2	AGPKZVBTJJNPAG-WHFBIAKZSA-N	6306	HMDB0000172	C00407	CCC(C)C(C(=O)O)N	24629-25-2	Organic compounds	Organic acids and derivatives	Carboxylic acids and derivatives	Amino acids, peptides, and analogues	Amino acids and derivatives	3	(Delphan M et al., 2018)(Li Z et al., 2022)(Liesenfeld DB et al., 2015)	CN, DE, DE
6	L-Tyrosine	181.19	C9H11NO3	OUYCCCASQSFEME-QMMMGPOBSA-N	6057	HMDB0000158	C00082	C1=CC(=CC=C1CC(C(=O)O)N)O	55520-40-6	Organic compounds	Organic acids and derivatives	Carboxylic acids and derivatives	Amino acids, peptides, and analogues	Amino acids and derivatives	3	(Eisner R et al., 2013)(Li Z et al., 2022)(Liesenfeld DB et al., 2015)	CA, CN, DE
7	Succinic acid	118.09	C4H6O4	KDYFGRWQOYBRFD-UHFFFAOYSA-N	1110	HMDB0000254	C00042	C(CC(=O)O)C(=O)O	110-15-6	Organic compounds	Organic acids and derivatives	Carboxylic acids and derivatives	Dicarboxylic acids and derivatives	Dicarboxylic acids and derivatives	3	(Deng L et al., 2017a)(Li Z et al., 2022)(Liesenfeld DB et al., 2015)	CA, CN, DE
8	trans-Aconitic acid	174.11	C6H6O6	GTZCVFVGUGFEME-HNQUOIGGSA-N	444212	HMDB0000958	C02341	C(C(=CC(=O)O)C(=O)O)C(=O)O	499-12-7	Organic compounds	Organic acids and derivatives	Carboxylic acids and derivatives	Tricarboxylic acids and derivatives	Tricarboxylic acids and derivatives	3	(Li Z et al., 2022)(Liesenfeld DB et al., 2015)(Wang Z et al., 2017)	CN, CN, DE
9	Trigonelline	137.14	C7H7NO2	WWNNZCOKKKDOPX-UHFFFAOYSA-N	5570	HMDB0000875	C01004	C[N+]1=CC=CC(=C1)C(=O)[O-]	535-83-1	Organic compounds	Alkaloids and derivatives			Alkaloids and derivatives	3	(Eisner R et al., 2013)(Li Z et al., 2022)(Wang Z et al., 2017)	CA, CN, CN
10	Uracil	112.09	C4H4N2O2	ISAKRJDGNUQOIC-UHFFFAOYSA-N	1174	HMDB0000300	C00106	C1=CNC(=O)NC1=O	103204-67-7	Organic compounds	Organoheterocyclic compounds	Diazines	Pyrimidines and pyrimidine derivatives	Pyrimidones	3	(Li Z et al., 2022)(Ose J et al., 2019)(Wang Z et al., 2017)	CN, CN, DE
11	Urea	60.06	CH4N2O	XSQUKJJJFZCRTK-UHFFFAOYSA-N	1176	HMDB0000294	C00086	C(=O)(N)N	4744-36-9	Organic compounds	Organic acids and derivatives	Organic carbonic acids and derivatives	Ureas	Ureas	3	(Kim ER et al., 2019)(Liesenfeld DB et al., 2015)(Wang Z et al., 2017)	CN, DE, KR
12	Ascorbic acid	176.12	C6H8O6	CIWBSHSKHKDKBQ-JLAZNSOCSA-N	54670067	HMDB0000044	C00072	C(C(C1C(=C(C(=O)O1)O)O)O)O	299-36-5	Organic compounds	Organoheterocyclic compounds	Dihydrofurans	Furanones	Butenolides	2	(Deng L et al., 2017a)(Kim ER et al., 2019)	CA, KR
13	Choline	104.17	C5H14NO	OEYIOHPDSNJKLS-UHFFFAOYSA-N	305	HMDB0000097	C00114	C[N+](C)(C)CCO	123-41-1	Organic compounds	Organic nitrogen compounds	Organonitrogen compounds	Quaternary ammonium salts	Cholines	2	(Li Z et al., 2022)(Wang Z et al., 2017)	CN, CN
14	Creatine	131.13	C4H9N3O2	CVSVTCORWBXHQV-UHFFFAOYSA-N	586	HMDB0000064	C00300	CN(CC(=O)O)C(=N)N	57-00-1	Organic compounds	Organic acids and derivatives	Carboxylic acids and derivatives	Amino acids, peptides, and analogues	Amino acids and derivatives	2	(Li Z et al., 2022)(Wang Z et al., 2017)	CN, CN
15	Fumaric acid	116.07	C4H4O4	VZCYOOQTPOCHFL-OWOJBTEDSA-N	444972	HMDB0000134	C00122	C(=CC(=O)O)C(=O)O	110-17-8	Organic compounds	Organic acids and derivatives	Carboxylic acids and derivatives	Dicarboxylic acids and derivatives	Dicarboxylic acids and derivatives	2	(Li Z et al., 2022)(Wang Z et al., 2017)	CN, CN
16	Glycine	75.0667	C2H5NO2	DHMQDGOQFOQNFH-UHFFFAOYSA-N	750	HMDB0000123	C00037	C(C(=O)O)N	112898-03-0	Organic compounds	Organic acids and derivatives	Carboxylic acids and derivatives	Amino acids, peptides, and analogues	Amino acids and derivatives	2	(Li Z et al., 2022)(Ose J et al., 2019)	CN, DE
17	Hippuric acid	179.17	C9H9NO3	QIAFMBKCNZACKA-UHFFFAOYSA-N	464	HMDB0000714	C01586	C1=CC=C(C=C1)C(=O)NCC(=O)O	140480-84-8	Organic compounds	Benzenoids	Benzene and substituted derivatives	Benzoic acids and derivatives	Benzamides	2	(Kim ER et al., 2019)(Wang Z et al., 2017)	CN, KR
18	Indole-3-acetic acid	175.18	C10H9NO2	SEOVTRFCIGRIMH-UHFFFAOYSA-N	802	HMDB0000197	C00954	C1=CC=C2C(=C1)C(=CN2)CC(=O)O	24420-86-8	Organic compounds	Organoheterocyclic compounds	Indoles and derivatives	Indolyl carboxylic acids and derivatives	Indole-3-acetic acid derivatives	2	(Liesenfeld DB et al., 2015)(Wang Z et al., 2017)	CN, DE
19	L-Glutamine	146.14	C5H10N2O3	ZDXPYRJPNDTMRX-VKHMYHEASA-N	5961	HMDB0000641	C00064	C(CC(=O)N)C(C(=O)O)N	32640-56-5	Organic compounds	Organic acids and derivatives	Carboxylic acids and derivatives	Amino acids, peptides, and analogues	Amino acids and derivatives	2	(Li Z et al., 2022)(Wang Z et al., 2017)	CN, CN
20	L-Leucine	131.17	C6H13NO2	ROHFNLRQFUQHCH-YFKPBYRVSA-N	6106	HMDB0000687	C00123	CC(C)CC(C(=O)O)N	112245-13-3	Organic compounds	Organic acids and derivatives	Carboxylic acids and derivatives	Amino acids, peptides, and analogues	Amino acids and derivatives	2	(Delphan M et al., 2018)(Li Z et al., 2022)	CN, DE
21	L-Threonine	119.12	C4H9NO3	AYFVYJQAPQTCCC-GBXIJSLDSA-N	6288	HMDB0000167	C00188	CC(C(C(=O)O)N)O	13095-55-1	Organic compounds	Organic acids and derivatives	Carboxylic acids and derivatives	Amino acids, peptides, and analogues	Amino acids and derivatives	2	(Kim ER et al., 2019)(Liesenfeld DB et al., 2015)	DE, KR
22	L-Tryptophan	204.23	C11H12N2O2	QIVBCDIJIAJPQS-VIFPVBQESA-N	6305	HMDB0000929	C00078	C1=CC=C2C(=C1)C(=CN2)CC(C(=O)O)N	73-22-3	Organic compounds	Organoheterocyclic compounds	Indoles and derivatives	Indolyl carboxylic acids and derivatives	Indolyl carboxylic acids and derivatives	2	(Li Z et al., 2022)(Liesenfeld DB et al., 2015)	CN, DE
23	L-Valine	117.15	C5H11NO2	KZSNJWFQEVHDMF-BYPYZUCNSA-N	6287	HMDB0000883	C00183	CC(C)C(C(=O)O)N	146548-59-6	Organic compounds	Organic acids and derivatives	Carboxylic acids and derivatives	Amino acids, peptides, and analogues	Amino acids and derivatives	2	(Kim ER et al., 2019)(Li Z et al., 2022)	CN, KR
24	Pyruvic acid	88.06	C3H3O3	LCTONWCANYUPML-UHFFFAOYSA-N	1060	HMDB0000243	C00022	CC(=O)C(=O)O	127-17-3	Organic compounds	Organic acids and derivatives	Keto acids and derivatives	Alpha-keto acids and derivatives	Alpha-keto acids and derivatives	2	(Li Z et al., 2022)(Liesenfeld DB et al., 2015)	CN, DE
25	2,3-Butanediol	90.12	C4H10O2	OWBTYPJTUOEWEK-UHFFFAOYSA-N	262	HMDB0003156	C03044	CC(C(C)O)O	123513-85-9	Organic compounds	Organic oxygen compounds	Organooxygen compounds	Alcohols and polyols	Polyols	1	(Liesenfeld DB et al., 2015)	DE
26	2,3-Dihydroxybutanoic acid	120	C4H8O4	LOUGYXZSURQALL-UHFFFAOYSA-N	250402	HMDB0000498		CC(C(C(=O)O)O)O	3413-97-6	Organic compounds	Organic oxygen compounds	Organooxygen compounds	Carbohydrates and carbohydrate conjugates	Sugar acids and derivatives	1	(Liesenfeld DB et al., 2015)	DE
27	2-Aminobutyrate	103.12	C4H9NO2	QWCKQJZIFLGMSD-UHFFFAOYSA-N	517460	HMDB0000452	C02356	CCC(C(=O)[O-])[NH3+]	1492-24-6	Organic compounds	Organic acids and derivatives	Carboxylic acids and derivatives	Amino acids, peptides, and analogues	Amino acids and derivatives	1	(Liesenfeld DB et al., 2015)	DE
28	2-Hydroxy-3-methylbutyric acid	118.13	C5H10O3	NGEWQZIDQIYUNV-UHFFFAOYSA-N	99823	HMDB0000407		CC(C)C(C(=O)O)O	17407-55-5	Organic compounds	Lipids and lipid-like molecules	Fatty Acyls	Fatty acids and conjugates	Hydroxy fatty acids	1	(Liesenfeld DB et al., 2015)	DE
29	2-Hydroxybutyric acid	104.105	C4H8O3	AFENDNXGAFYKQO-VKHMYHEASA-N	440864	HMDB0000008	C05984	CCC(C(=O)O)O	3347-90-8	Organic compounds	Organic acids and derivatives	Hydroxy acids and derivatives	Alpha hydroxy acids and derivatives	Alpha hydroxy acids and derivatives	1	(Li Z et al., 2022)	CN
30	2-Hydroxyglutaric acid	148.11	C5H8O5	HWXBTNAVRSUOJR-UHFFFAOYSA-N	43	HMDB0059655	C02630	C(CC(=O)O)C(C(=O)O)O	13095-47-1	Organic compounds	Organic acids and derivatives	Hydroxy acids and derivatives	Short-chain hydroxy acids and derivatives	Short-chain hydroxy acids and derivatives	1	(Liesenfeld DB et al., 2015)	DE
31	2-O-(alpha-D-glucopyranosyl)glycerol	254.23	C9H18O8	AQTKXCPRNZDOJU-ZEBDFXRSSA-N	10106330			C(C1C(C(C(C(O1)OC(CO)CO)O)O)O)O	22160-26-5	Organic compounds	Lipids and lipid-like molecules	Glycerolipids	Glycosylglycerols	Glycosylglycerols	1	(Liesenfeld DB et al., 2015)	DE
32	3,4-Dihydroxybutanoic acid	120	C4H8O4	DZAIOXUZHHTJKN-UHFFFAOYSA-N	150929	HMDB0000337		C(C(CO)O)C(=O)O	1518-61-2	Organic compounds	Organic acids and derivatives	Hydroxy acids and derivatives	Beta hydroxy acids and derivatives	Beta hydroxy acids and derivatives	1	(Liesenfeld DB et al., 2015)	DE
33	3-Aminoisobutyrate	102.11	C4H8NO2	QCHPKSFMDHPSNR-UHFFFAOYSA-M	64956	HMDB0003911	C05145	CC(CN)C(=O)[O-]		Organic compounds	Organic acids and derivatives	Carboxylic acids and derivatives	Amino acids, peptides, and analogues	Amino acids and derivatives	1	(Kim ER et al., 2019)	KR
34	3-Hydroxybutyric acid	104.1	C4H8O3	WHBMMWSBFZVSSR-UHFFFAOYSA-N	441	HMDB0000357	C01089	CC(CC(=O)O)O	300-85-6	Organic compounds	Organic acids and derivatives	Hydroxy acids and derivatives	Beta hydroxy acids and derivatives	Beta hydroxy acids and derivatives	1	(Wang H et al., 2014)	CA
35	3-Hydroxyhippuric acid	195	C9H9NO4	XDOFWFNMYJRHEW-UHFFFAOYSA-N	450268	HMDB0006116		C1=CC(=CC(=C1)O)C(=O)NCC(=O)O	1637-75-8	Organic compounds	Benzenoids	Benzene and substituted derivatives	Benzoic acids and derivatives	Benzamides	1	(Liesenfeld DB et al., 2015)	DE
36	3-Hydroxyisobutyric acid	104	C4H8O3	DBXBTMSZEOQQDU-UHFFFAOYSA-N	87	HMDB0062640	C01188	CC(CO)C(=O)O	1910-47-0	Organic compounds	Organic acids and derivatives	Hydroxy acids and derivatives	Beta hydroxy acids and derivatives	Beta hydroxy acids and derivatives	1	(Liesenfeld DB et al., 2015)	DE
37	3-Hydroxymandelic acid	168.15	C8H8O4	OLSDAJRAVOVKLG-UHFFFAOYSA-N	86957	HMDB0000750		C1=CC(=CC(=C1)O)C(C(=O)O)O	17119-15-2	Organic compounds	Benzenoids	Phenols	1-hydroxy-4-unsubstituted benzenoids	1-hydroxy-4-unsubstituted benzenoids	1	(Wang H et al., 2014)	CA
38	3-Methylxanthine	166.138	C6H6N4O2	GMSNIKWWOQHZGF-UHFFFAOYSA-N	70639	HMDB0001886	C16357	CN1C2=C(C(=O)NC1=O)NC=N2	1076-22-8	Organic compounds	Organoheterocyclic compounds	Imidazopyrimidines	Purines and purine derivatives	Xanthines	1	(Ose J et al., 2019)	DE
39	3-Phenylpropionic acid	150.175	C9H10O2	XMIIGOLPHOKFCH-UHFFFAOYSA-N	107	HMDB0000764	C05629	C1=CC=C(C=C1)CCC(=O)O	501-52-0	Organic compounds	Phenylpropanoids and polyketides	Phenylpropanoic acids		Phenylpropanoic acids	1	(Ose J et al., 2019)	DE
40	3-Phosphoglycerate	186	C3H7O7P	OSJPPGNTCRNQQC-UHFFFAOYSA-N	724	HMDB0000807	C00597	C(C(C(=O)O)O)OP(=O)(O)O	3443-58-1	Organic compounds	Organic oxygen compounds	Organooxygen compounds	Carbohydrates and carbohydrate conjugates	Sugar acids and derivatives	1	(Liesenfeld DB et al., 2015)	DE
41	4-Hydroxybenzoic acid	138.12	C7H6O3	FJKROLUGYXJWQN-UHFFFAOYSA-N	135	HMDB0000500	C00156	C1=CC(=CC=C1C(=O)O)O	99-96-7	Organic compounds	Benzenoids	Benzene and substituted derivatives	Benzoic acids and derivatives	Hydroxybenzoic acid derivatives	1	(Li Z et al., 2022)	CN
42	4-Hydroxyhippuric acid	195	C9H9NO4	ZMHLUFWWWPBTIU-UHFFFAOYSA-N	151012	HMDB0013678		C1=CC(=CC=C1C(=O)NCC(=O)O)O	2482-25-9	Organic compounds	Benzenoids	Benzene and substituted derivatives	Benzoic acids and derivatives	Benzamides	1	(Liesenfeld DB et al., 2015)	DE
43	4-Hydroxyphenylacetic acid	152.15	C8H8O3	XQXPVVBIMDBYFF-UHFFFAOYSA-N	127	HMDB0000020	C00642	C1=CC(=CC=C1CC(=O)O)O	156-38-7	Organic compounds	Benzenoids	Phenols	1-hydroxy-2-unsubstituted benzenoids	1-hydroxy-2-unsubstituted benzenoids	1	(Li Z et al., 2022)	CN
44	4-Pyridoxic acid	183.16	C8H9NO4	HXACOUQIXZGNBF-UHFFFAOYSA-N	6723	HMDB0000017	C00847	CC1=NC=C(C(=C1O)C(=O)O)CO	524-07-2	Organic compounds	Organoheterocyclic compounds	Pyridines and derivatives	Pyridinecarboxylic acids and derivatives	Pyridinecarboxylic acids	1	(Wang Z et al., 2017)	CN
45	Acetic Acid	60.05	C2H4O2	QTBSBXVTEAMEQO-UHFFFAOYSA-N	176	HMDB0000042	C00033	CC(=O)O	64-19-7	Organic compounds	Organic acids and derivatives	Carboxylic acids and derivatives	Carboxylic acids	Carboxylic acids	1	(Li Z et al., 2022)	CN
46	Acetoacetic acid	102.09	C4H6O3	WDJHALXBUFZDSR-UHFFFAOYSA-N	96	HMDB0000060	C00164	CC(=O)CC(=O)O	4387-93-3	Organic compounds	Organic acids and derivatives	Keto acids and derivatives	Short-chain keto acids and derivatives	Short-chain keto acids and derivatives	1	(Wang Z et al., 2017)	CN
47	Adipic acid	146.14	C6H10O4	WNLRTRBMVRJNCN-UHFFFAOYSA-N	196	HMDB0000448	C06104	C(CCC(=O)O)CC(=O)O	124-04-9	Organic compounds	Lipids and lipid-like molecules	Fatty Acyls	Fatty acids and conjugates	Medium-chain fatty acids	1	(Wang H et al., 2014)	CA
48	Benzoic acid	122.12	C7H6O2	WPYMKLBDIGXBTP-UHFFFAOYSA-N	243	HMDB0001870	C00539	C1=CC=C(C=C1)C(=O)[O-]	532-32-1	Organic compounds	Benzenoids	Benzene and substituted derivatives	Benzoic acids and derivatives	Benzoic acids	1	(Wang H et al., 2014)	CA
49	beta-Hydroxyisovaleric acid	118.131	C5H10O3	AXFYFNCPONWUHW-UHFFFAOYSA-N	69362	HMDB0000754		CC(C)(CC(=O)O)O	4026-18-0	Organic compounds	Lipids and lipid-like molecules	Fatty Acyls	Fatty acids and conjugates	Hydroxy fatty acids	1	(Li Z et al., 2022)	CN
50	Betaine	117.147	C5H11NO2	KWIUHFFTVRNATP-UHFFFAOYSA-N	247	HMDB0000043	C00719	C[N+](C)(C)CC(=O)[O-]	107-43-7	Organic compounds	Organic acids and derivatives	Carboxylic acids and derivatives	Amino acids, peptides, and analogues	Amino acids and derivatives	1	(Li Z et al., 2022)	CN
51	Cholic acid	408.572	C24H40O5	BHQCQFFYRZLCQQ-OELDTZBJSA-N	221493	HMDB0000619	C00695	CC(CCC(=O)O)C1CCC2C1(C(CC3C2C(CC4C3(CCC(C4)O)C)O)O)C	81-25-4	Organic compounds	Lipids and lipid-like molecules	Steroids and steroid derivatives	Bile acids, alcohols and derivatives	Hydroxy bile acids, alcohols and derivatives	1	(Ose J et al., 2019)	DE
52	Cinnamic acid	148.16	C9H8O2	WBYWAXJHAXSJNI-VOTSOKGWSA-N	444539	HMDB0000930	C10438	C1=CC=C(C=C1)C=CC(=O)O	140-10-3	Organic compounds	Phenylpropanoids and polyketides	Cinnamic acids and derivatives	Cinnamic acids	Cinnamic acids	1	(Wang Z et al., 2017)	CN
53	cis-Aconitic acid	174.11	C6H6O6	GTZCVFVGUGFEME-IWQZZHSRSA-N	643757	HMDB0000072	C00417	C(C(=CC(=O)O)C(=O)O)C(=O)O	499-12-7	Organic compounds	Organic acids and derivatives	Carboxylic acids and derivatives	Tricarboxylic acids and derivatives	Tricarboxylic acids and derivatives	1	(Wang Z et al., 2017)	CN
54	Citric acid	192.12	C6H8O7	KRKNYBCHXYNGOX-UHFFFAOYSA-N	311	HMDB0000094	C00158	C(C(=O)O)C(CC(=O)O)(C(=O)O)O	12262-73-6	Organic compounds	Organic acids and derivatives	Carboxylic acids and derivatives	Tricarboxylic acids and derivatives	Tricarboxylic acids and derivatives	1	(Kim ER et al., 2019)	KR
55	D-Glucose	180.16	C6H12O6	WQZGKKKJIJFFOK-GASJEMHNSA-N	5793	HMDB0000122	C00031	C(C1C(C(C(C(O1)O)O)O)O)O	2280-44-6	Organic compounds	Organic oxygen compounds	Organooxygen compounds	Carbohydrates and carbohydrate conjugates	Monosaccharides	1	(Li Z et al., 2022)	CN
56	Dimethyl sulfone	94.13	C2H6O2S	HHVIBTZHLRERCL-UHFFFAOYSA-N	6213	HMDB0004983	C11142	CS(=O)(=O)C	22230-82-6	Organic compounds	Organosulfur compounds	Sulfonyls	Sulfones	Sulfones	1	(Wang Z et al., 2017)	CN
57	D-Xylose	150.13	C5H10O5	SRBFZHDQGSBBOR-IOVATXLUSA-N	135191	HMDB0000098	C00181	C1C(C(C(C(O1)O)O)O)O	50855-32-8	Organic compounds	Organic oxygen compounds	Organooxygen compounds	Carbohydrates and carbohydrate conjugates	Monosaccharides	1	(Li Z et al., 2022)	CN
58	Ethanol	46.07	C2H6O	LFQSCWFLJHTTHZ-UHFFFAOYSA-N	702	HMDB0000108	C00469	CCO	704-15-4	Organic compounds	Organic oxygen compounds	Organooxygen compounds	Alcohols and polyols	Primary alcohols	1	(Wang H et al., 2014)	CA
59	Ethanolamine	61.0832	C2H7NO	HZAXFHJVJLSVMW-UHFFFAOYSA-N	700	HMDB0000149	C00189	C(CO)N	1173022-58-6	Organic compounds	Organic nitrogen compounds	Organonitrogen compounds	Amines	Alkanolamines	1	(Li Z et al., 2022)	CN
60	Formic acid	46.025	CH2O2	BDAGIHXWWSANSR-UHFFFAOYSA-N	284	HMDB0000142	C00058	C(=O)O	64-18-6	Organic compounds	Organic acids and derivatives	Carboxylic acids and derivatives	Carboxylic acids	Carboxylic acids	1	(Li Z et al., 2022)	CN
61	Galactaric acid	210.14	C6H10O8	DSLZVSRJTYRBFB-DUHBMQHGSA-N	3037582	HMDB0000639	C00879	C(C(C(C(=O)O)O)O)(C(C(=O)O)O)O	526-99-8	Organic compounds	Organic oxygen compounds	Organooxygen compounds	Carbohydrates and carbohydrate conjugates	Sugar acids and derivatives	1	(Liesenfeld DB et al., 2015)	DE
62	gamma-Glutamylvaline	246.26	C10H18N2O5	AQAKHZVPOOGUCK-XPUUQOCRSA-N	7015683	HMDB0011172		CC(C)C(C(=O)O)NC(=O)CCC(C(=O)O)N		Organic compounds	Organic acids and derivatives	Carboxylic acids and derivatives	Amino acids, peptides, and analogues	Peptides	1	(Liesenfeld DB et al., 2015)	DE
63	Gluconic acid	196.16	C6H12O7	RGHNJXZEOKUKBD-SQOUGZDYSA-N	10690	HMDB0000625	C00257	C(C(C(C(C(C(=O)O)O)O)O)O)O	526-95-4	Organic compounds	Organic oxygen compounds	Organooxygen compounds	Carbohydrates and carbohydrate conjugates	Sugar acids and derivatives	1	(Liesenfeld DB et al., 2015)	DE
64	Glycerol	92.09	C3H8O3	PEDCQBHIVMGVHV-UHFFFAOYSA-N	753	HMDB0000131	C00116	C(C(CO)O)O	25618-55-7	Organic compounds	Organic oxygen compounds	Organooxygen compounds	Carbohydrates and carbohydrate conjugates	Sugar alcohols	1	(Kim ER et al., 2019)	KR
65	Glycocyamine	117.11	C3H7N3O2	BPMFZUMJYQTVII-UHFFFAOYSA-N	763	HMDB0000128	C00581	C(C(=O)[O-])[NH+]=C(N)N	352-97-6	Organic compounds	Organic acids and derivatives	Carboxylic acids and derivatives	Amino acids, peptides, and analogues	Amino acids and derivatives	1	(Wang Z et al., 2017)	CN
66	Guaiacol	124.14	C7H8O2	LHGVFZTZFXWLCP-UHFFFAOYSA-N	460	HMDB0001398	C15572	COC1=CC=CC=C1O	90-05-1	Organic compounds	Benzenoids	Phenols	Methoxyphenols	Methoxyphenols	1	(Liesenfeld DB et al., 2015)	DE
67	Homogentisic acid	168.15	C8H8O4	IGMNYECMUMZDDF-UHFFFAOYSA-N	780	HMDB0000130	C00544	C1=CC(=C(C=C1O)CC(=O)O)O	451-13-8	Organic compounds	Benzenoids	Benzene and substituted derivatives	Phenylacetic acids	2(hydroxyphenyl)acetic acids	1	(Wang Z et al., 2017)	CN
68	Hydroquinone	110.11	C6H6O2	QIGBRXMKCJKVMJ-UHFFFAOYSA-N	785	HMDB0002434	C00530	C1=CC(=CC=C1O)O	122-95-2	Organic compounds	Benzenoids	Phenols	Benzenediols	Hydroquinones	1	(Liesenfeld DB et al., 2015)	DE
69	Hydroxyprolyl-Hydroxyproline	244.24	C10H16N2O5	HXWNRESJYUCPRA-UHFFFAOYSA-N	61159526	HMDB0028864		C1C(CNC1C(=O)N2CC(CC2C(=O)O)O)O		Organic compounds	Organic acids and derivatives	Carboxylic acids and derivatives	Amino acids, peptides, and analogues	Peptides	1	(Liesenfeld DB et al., 2015)	DE
70	Indoxyl sulfate	213.212	C8H7NO4S	BXFFHSIDQOFMLE-UHFFFAOYSA-N	10258	HMDB0000682		C1=CC=C2C(=C1)C(=CN2)OS(=O)(=O)O	130385-38-5	Organic compounds	Organic acids and derivatives	Organic sulfuric acids and derivatives	Arylsulfates	Arylsulfates	1	(Li Z et al., 2022)	CN
71	Inositol	180.16	C6H12O6	CDAISMWEOUEBRE-UHFFFAOYSA-N	892	HMDB0000211	C00137	C1(C(C(C(C(C1O)O)O)O)O)O	173524-45-3	Organic compounds	Organic oxygen compounds	Organooxygen compounds	Alcohols and polyols	Secondary alcohols	1	(Liesenfeld DB et al., 2015)	DE
72	Isobutyric acid	88.1053	C4H8O2	KQNPFQTWMSNSAP-UHFFFAOYSA-N	6590	HMDB0001873	C02632	CC(C)C(=O)O	149-57-5	Organic compounds	Organic acids and derivatives	Carboxylic acids and derivatives	Carboxylic acids	Carboxylic acids	1	(Ose J et al., 2019)	DE
73	Isocitric acid	192.12	C6H8O7	ODBLHEXUDAPZAU-UHFFFAOYSA-N	1198	HMDB0000193	C00311	C(C(C(C(=O)O)O)C(=O)O)C(=O)O	320-77-4	Organic compounds	Organic acids and derivatives	Carboxylic acids and derivatives	Tricarboxylic acids and derivatives	Tricarboxylic acids and derivatives	1	(Wang Z et al., 2017)	CN
74	Lactic acid	90.08	C3H6O3	JVTAAEKCZFNVCJ-UHFFFAOYSA-N	612	HMDB0144295	C01432	CC(C(=O)O)O	10326-41-7	Organic compounds	Organic acids and derivatives	Hydroxy acids and derivatives	Alpha hydroxy acids and derivatives	Alpha hydroxy acids and derivatives	1	(Li Z et al., 2022)	CN
75	L-Arabinose	150	C5H10O5	SRBFZHDQGSBBOR-HWQSCIPKSA-N	439195	HMDB0000646	C00259	C1C(C(C(C(O1)O)O)O)O	147-81-9	Organic compounds	Organic oxygen compounds	Organooxygen compounds	Carbohydrates and carbohydrate conjugates	Monosaccharides	1	(Liesenfeld DB et al., 2015)	DE
76	L-Arginine	174.2	C6H14N4O2	ODKSFYDXXFIFQN-BYPYZUCNSA-N	6322	HMDB0000517	C00062	C(CC(C(=O)O)N)CN=C(N)N	1119-34-2	Organic compounds	Organic acids and derivatives	Carboxylic acids and derivatives	Amino acids, peptides, and analogues	Amino acids and derivatives	1	(Ose J et al., 2019)	DE
77	L-Asparagine	132.12	C4H8N2O3	DCXYFEDJOCDNAF-REOHCLBHSA-N	6267	HMDB0000168	C00152	C(C(C(=O)O)N)C(=O)N	3130-87-8	Organic compounds	Organic acids and derivatives	Carboxylic acids and derivatives	Amino acids, peptides, and analogues	Amino acids and derivatives	1	(Wang Z et al., 2017)	CN
78	L-Cysteine	121.16	C3H7NO2S	XUJNEKJLAYXESH-REOHCLBHSA-N	5862	HMDB0000574	C00097	C(C(C(=O)O)N)S	4371-52-2	Organic compounds	Organic acids and derivatives	Carboxylic acids and derivatives	Amino acids, peptides, and analogues	Amino acids and derivatives	1	(Wang Z et al., 2017)	CN
79	L-Glutamic acid	147.13	C5H9NO4	WHUUTDBJXJRKMK-VKHMYHEASA-N	33032	HMDB0000148	C00025	C(CC(=O)O)C(C(=O)O)N	56-86-0	Organic compounds	Organic acids and derivatives	Carboxylic acids and derivatives	Amino acids, peptides, and analogues	Amino acids and derivatives	1	(Li Z et al., 2022)	CN
80	L-Histidine	155.15	C6H9N3O2	HNDVDQJCIGZPNO-YFKPBYRVSA-N	6274	HMDB0000177	C00135	C1=C(NC=N1)CC(C(=O)O)N	150-35-6	Organic compounds	Organic acids and derivatives	Carboxylic acids and derivatives	Amino acids, peptides, and analogues	Amino acids and derivatives	1	(Li Z et al., 2022)	CN
81	L-Homocysteine	135.19	C4H9NO2S	FFFHZYDWPBMWHY-VKHMYHEASA-N	91552	HMDB0000742	C00155	C(CS)C(C(=O)[O-])[NH3+]	6027-13-0	Organic compounds	Organic acids and derivatives	Carboxylic acids and derivatives	Amino acids, peptides, and analogues	Amino acids and derivatives	1	(Wang Z et al., 2017)	CN
82	L-Lysine	146.19	C6H14N2O2	KDXKERNSBIXSRK-YFKPBYRVSA-N	5962	HMDB0000182	C00047	C(CCN)CC(C(=O)O)N	20166-34-1	Organic compounds	Organic acids and derivatives	Carboxylic acids and derivatives	Amino acids, peptides, and analogues	Amino acids and derivatives	1	(Li Z et al., 2022)	CN
83	L-Methionine	149.21	C5H11NO2S	FFEARJCKVFRZRR-BYPYZUCNSA-N	6137	HMDB0000696	C00073	CSCCC(C(=O)O)N	24425-78-3	Organic compounds	Organic acids and derivatives	Carboxylic acids and derivatives	Amino acids, peptides, and analogues	Amino acids and derivatives	1	(Ose J et al., 2019)	DE
84	L-Phenylalanine	165.19	C9H11NO2	COLNVLDHVKWLRT-QMMMGPOBSA-N	6140	HMDB0000159	C00079	C1=CC=C(C=C1)CC(C(=O)O)N	149597-92-2	Organic compounds	Organic acids and derivatives	Carboxylic acids and derivatives	Amino acids, peptides, and analogues	Amino acids and derivatives	1	(Wang Z et al., 2017)	CN
85	L-Serine	105.09	C3H7NO3	MTCFGRXMJLQNBG-REOHCLBHSA-N	5951	HMDB0000187	C00065	C(C(C(=O)O)N)O	302-84-1	Organic compounds	Organic acids and derivatives	Carboxylic acids and derivatives	Amino acids, peptides, and analogues	Amino acids and derivatives	1	(Li Z et al., 2022)	CN
86	Maleamic acid	115	C4H5NO3	FSQQTNAZHBEJLS-UPHRSURJSA-N	5280451	HMDB0254310	C01596	C(=CC(=O)O)C(=O)N	29996-04-1	Organic compounds	Lipids and lipid-like molecules	Fatty Acyls	Fatty acids and conjugates	Straight chain fatty acids	1	(Liesenfeld DB et al., 2015)	DE
87	Mannitol	182	C6H14O6	FBPFZTCFMRRESA-KVTDHHQDSA-N	6251	HMDB0000765	C00392	C(C(C(C(C(CO)O)O)O)O)O	133-43-7	Organic compounds	Organic oxygen compounds	Organooxygen compounds	Carbohydrates and carbohydrate conjugates	Sugar alcohols	1	(Liesenfeld DB et al., 2015)	DE
88	Methanol	32.0419	CH4O	OKKJLVBELUTLKV-UHFFFAOYSA-N	887	HMDB0001875	C00132	CO	14742-26-8	Organic compounds	Organic oxygen compounds	Organooxygen compounds	Alcohols and polyols	Primary alcohols	1	(Li Z et al., 2022)	CN
89	Methylamine	31.06	CH5N	BAVYZALUXZFZLV-UHFFFAOYSA-N	6329	HMDB0000164	C00218	CN	3767-37-1	Organic compounds	Organic nitrogen compounds	Organonitrogen compounds	Amines	Primary amines	1	(Wang Z et al., 2017)	CN
90	N-Methyl-L-histidine	169.181	C7H11N3O2	CYZKJBZEIFWZSR-LURJTMIESA-N	90638		C03298	CNC(CC1=CN=CN1)C(=O)O	24886-03-1	Organic compounds	Organic acids and derivatives	Carboxylic acids and derivatives	Amino acids, peptides, and analogues	Amino acids and derivatives	1	(Li Z et al., 2022)	CN
91	Oxalic acid	90.03	C2H2O4	MUBZPKHOEPUJKR-UHFFFAOYSA-N	971	HMDB0002329	C00209	C(=O)(C(=O)O)O	10377-62-5	Organic compounds	Organic acids and derivatives	Carboxylic acids and derivatives	Dicarboxylic acids and derivatives	Dicarboxylic acids and derivatives	1	(Liesenfeld DB et al., 2015)	DE
92	p-Cresol	108.14	C7H8O	IWDCLRJOBJJRNH-UHFFFAOYSA-N	2879	HMDB0001858	C01468	CC1=CC=C(C=C1)O	106-44-5	Organic compounds	Benzenoids	Phenols	Cresols	Para cresols	1	(Liesenfeld DB et al., 2015)	DE
93	P-Cresol glucoronide	284.26	C13H16O7	JPAUCQAJHLSMQW-XPORZQOISA-N	154035	HMDB0011686		CC1=CC=C(C=C1)OC2C(C(C(C(O2)C(=O)O)O)O)O	17680-99-8	Organic compounds	Organic oxygen compounds	Organooxygen compounds	Carbohydrates and carbohydrate conjugates	Glycosyl compounds	1	(Liesenfeld DB et al., 2015)	DE
94	Phenylacetylglutamine	264.278	C13H16N2O4	JFLIEFSWGNOPJJ-JTQLQIEISA-N	92258	HMDB0006344	C04148	C1=CC=C(C=C1)CC(=O)NC(CCC(=O)N)C(=O)O	28047-15-6	Organic compounds	Organic acids and derivatives	Carboxylic acids and derivatives	Amino acids, peptides, and analogues	Amino acids and derivatives	1	(Li Z et al., 2022)	CN
95	Propylene glycol	76.0945	C3H8O2	DNIAPMSPPWPWGF-UHFFFAOYSA-N	1030	HMDB0001881	C00583	CC(CO)O	25322-68-3	Organic compounds	Organic oxygen compounds	Organooxygen compounds	Alcohols and polyols	Polyols	1	(Li Z et al., 2022)	CN
96	Pyrogallol	126	C6H6O3	WQGWDDDVZFFDIG-UHFFFAOYSA-N	1057	HMDB0013674	C01108	C1=CC(=C(C(=C1)O)O)O	35296-77-6	Organic compounds	Benzenoids	Phenols	Benzenetriols and derivatives	Pyrogallols and derivatives	1	(Liesenfeld DB et al., 2015)	DE
97	Pyrrole-2-carboxylic acid	111	C5H5NO2	WRHZVMBBRYBTKZ-UHFFFAOYSA-N	12473	HMDB0004230	C05942	C1=CNC(=C1)C(=O)O	634-97-9	Organic compounds	Organoheterocyclic compounds	Pyrroles	Pyrrole carboxylic acids and derivatives	Pyrrole carboxylic acids	1	(Liesenfeld DB et al., 2015)	DE
98	Tartaric acid	150.09	C4H6O6	FEWJPZIEWOKRBE-JCYAYHJZSA-N	444305	HMDB0000956	C00898	C(C(C(=O)O)O)(C(=O)O)O	134865-37-5	Organic compounds	Organic oxygen compounds	Organooxygen compounds	Carbohydrates and carbohydrate conjugates	Sugar acids and derivatives	1	(Liesenfeld DB et al., 2015)	DE
99	Taurine	125.15	C2H7NO3S	XOAAWQZATWQOTB-UHFFFAOYSA-N	1123	HMDB0000251	C00245	C(CS(=O)(=O)O)N	107-35-7	Organic compounds	Organic acids and derivatives	Organic sulfonic acids and derivatives	Organosulfonic acids and derivatives	Organosulfonic acids	1	(Kim ER et al., 2019)	KR
100	Thymidine	242.23	C10H14N2O5	IQFYYKKMVGJFEH-XLPZGREQSA-N	5789	HMDB0000273	C00214	CC1=CN(C(=O)NC1=O)C2CC(C(O2)CO)O	3424-98-4	Organic compounds	Nucleosides, nucleotides, and analogues	Pyrimidine nucleosides	Pyrimidine 2'-deoxyribonucleosides	Pyrimidine 2'-deoxyribonucleosides	1	(Wang Z et al., 2017)	CN

## Sheet: Table S2
#	Reference (Phase)	Group	BMI (kg/m2)	Colonoscopy	Smoking
1	Kim ER et al., 2019	CRC	23.56 (R: 18.3 - 33.4)	-	-
		Control	23 (R: 16.9 - 34.6)	-	-
2	Deng L et al., 2017a	Adenoma	-	yes	26-yes, 4-exSmoker, 119-no, 6-unknown
		Control	-	Posar colonoscopy a TS3	50-yes, 12-exSmoker, 449-no, 19-unknown
	Eisner R et al., 2013	Colonoscopy (adenoma, hiperplastic, CRC)			57-yes, 10-exSmoker, 274-no, 14-unknown
		Control			57-yes, 14-exSmoker, 540-no, 22-unknown
3	Li Z et al., 2022	CRC pre-S	23.0 (SD: 3.6)
		CRC post-S	22.8 (SD: 3.6)
		CRC post-C	22.3 (SD: 3.2)
		Control	20.9 (SD: 2.9)
4	Ose J et al., 2019	CRC Cac	25.60 (ND: 2.71)
		CRC pre-Cac	29.39 (ND: 3.35)
		CRC non-Cac	26.48 (ND: 4.26)
		CRC Cac - 6m	23.37 (ND: 3.08)
		CRC pre-Cac - 6m	28.11 (ND: 3.42)
		CRC non-Cac - 6m	26.54 (ND: 4.41)
5	Delphan M et al., 2018	CRC pre-S	26.6 (SD: 4.0)
		CRC post-S (6 m)	25.3 (SD: 3.9)
		CRC post-S (12 m)	26.5 (SD: 3.9)

## Sheet: Table S3
#	Reference	Study design	Population Characteristics	Diagnosis criteria	Sample collection and storage	Sample preparation	Experimental condition	Analytical validation	Compound identification	Data preprocessing	Statistical analysis
1	Delphan M et al., 2018	HB	LB	LB	HB	LB	LB	U	LB	LB	HB
2	Deng L et al., 2017a	LB	HB	LB	HB	LB	HB	LB	HB	U	HB
3	Deng L et al., 2017b	LB	HB	LB	LB	LB	LB	U	U	U	U
4	Eisner R et al., 2013	HB	LB	HB	LB	HB	LB	HB	LB	LB	HB
5	Kim ER et al., 2019	HB	LB	HB	LB	LB	HB	U	HB	LB	HB
6	Li Z et al., 2022	HB	LB	HB	LB	LB	LB	U	LB	LB	HB
7	Liesenfeld DB et al., 2015	HB	LB	HB	LB	HB	LB	U	LB	HB	LB
8	Ose J et al., 2019	HB	HB	LB	HB	LB	HB	U	LB	LB	HB
9	Wang H et al., 2014	HB	HB	LB	LB	LB	HB	LB	HB	U	LB
10	Wang Z et al., 2017	HB	LB	HB	LB	LB	LB	LB	LB	LB	HB

## Sheet: Table S4
#	Compound name	Delphan M et al., 2018	Deng L et al., 2017a	Deng L et al., 2017b	Eisner R et al., 2013	Kim ER et al., 2019	Li Z et al., 2022	Liesenfeld DB et al., 2015	(Ose J et al., 2019)	Wang H et al., 2014	Wang Z et al., 2017
1	2,3-Butanediol							DOWNc
2	2,3-Dihydroxybutanoic acid							UPc
3	2-Aminobutyrate							UPc
4	2-Hydroxy-3-methylbutyric acid							NDc
5	2-Hydroxybutyric acid						UPg / UPh
6	2-Hydroxyglutaric acid							UPc
7	2-O-(alpha-D-glucopyranosyl)glycerol							DOWNc
8	3,4-Dihydroxybutanoic acid							DOWNc
9	3-Aminoisobutyrate					UPa	DOWNc
10	3-Hydroxybutyric acid						DOWNc			NDa
11	3-Hydroxyhippuric acid							DOWNc
12	3-Hydroxyisobutyric acid							UPc
13	3-Hydroxymandelic acid									NDa
14	3-Methylxanthine								DOWNi
15	3-Phenylpropionic acid								DOWNk
16	3-Phosphoglycerate							DOWNc
17	4-Hydroxybenzoic acid						DOWNa / DOWNe / DOWNf / DOWNg
18	4-Hydroxyhippuric acid							DOWNc
19	4-Hydroxyphenylacetic acid						UPa
20	4-Pyridoxic acid										UPd
21	Acetic Acid						UPa / UPc
22	Acetoacetic acid										UPa
23	Acetone				DOWNb		DOWNc / UPf / UPh		UPi / DOWNk
24	Adipic acid									NDa
25	Ascorbic acid		NDa			DOWNa
26	Benzoic acid									NDa
27	beta-Hydroxyisovaleric acid						DOWNa / UPe / UPh
28	Betaine						UPe / UPf / DOWNg
29	Carnitine		NDa				DOWNg	DOWNc
30	Cholic acid								UPk
31	Choline						UPa / UPe				DOWNa
32	Cinnamic acid										UPd
33	cis-Aconitic acid										UPd / UPa
34	Citric acid					DOWNa
35	Creatine						UPa / UPe				DOWNd
36	Creatinine					DOWNa	DOWNc				DOWNa / DOWNd
37	D-Glucose						DOWNc / DOWNg
38	Dimethyl sulfone										DOWNa
39	D-Xylose						UPa / UPf
40	Ethanol									NDa
41	Ethanolamine						DOWNf / UPg / UPh
42	Formic acid						UPa / DOWNc / UPe
43	Fumaric acid						UPf				UPd
44	Galactaric acid							UPc
45	gamma-Glutamylvaline							UPc
46	Gluconic acid							DOWNc
47	Glycerol					DOWNa
48	Glycine						DOWNc		DOWNj
49	Glycocyamine										UPa
50	Guaiacol
51	Hippuric acid					DOWNa					DOWNa / UPd
52	Homogentisic acid										UPd
53	Hydroquinone							DOWNc
54	Hydroxyprolyl-Hydroxyproline							UPc
55	Indole-3-acetic acid							DOWNc			DOWNd
56	Indoxyl sulfate						UPg
57	Inositol							DOWNc
58	Isobutyric acid								UPj
59	Isocitric acid										DOWNa
60	Lactic acid						UPe / UPf / DOWNg
61	L-Alanine					UPa	DOWNg				DOWNa
62	L-Arabinose							DOWNc
63	L-Arginine								DOWNi / DOWNk
64	L-Asparagine										DOWNa
65	L-Cysteine										DOWNa
66	L-Glutamic acid						DOWNf / UPh
67	L-Glutamine						DOWNc / UPh				UPa
68	L-Histidine						DOWNa / DOWNe / DOWNf
69	L-Homocysteine										UPa
70	L-Isoleucine	NDc					UPe / UPh	UPc
71	L-Leucine	NDc					UPe / UPh
72	L-Lysine						DOWNc / UPe / UPf / DOWNg
73	L-Methionine								UPk
74	L-Phenylalanine										DOWNa
75	L-Serine						UPh
76	L-Threonine					DOWNa		DOWNc
77	L-Tryptophan						UPe / UPh	DOWNc
78	L-Tyrosine				UPb		UPe / UPh	DOWNc
79	L-Valine					UPa	UPe / UPh
80	Maleamic acid							DOWNc
81	Mannitol							DOWNc
82	Methanol						UPa / UPf
83	Methylamine										DOWNa
84	N-Methyl-L-histidine						DOWNa / DOWNf / UPg
85	Oxalic acid							DOWNc
86	p-Cresol							UPc
87	P-Cresol glucoronide							UPc
88	Phenylacetylglutamine						UPa / UPc
89	Propylene glycol						UPa / UPf
90	Pyrogallol							DOWNc
91	Pyrrole-2-carboxylic acid							DOWNc
92	Pyruvic acid						UPf / DOWNg	DOWNc
93	Succinic acid		NDa				UPa / UPg	DOWNc
94	Tartaric acid							DOWNc
95	Taurine					UPa
96	Thymidine										UPd
97	trans-Aconitic acid						DOWNf / UPg	DOWNc			UPa
98	Trigonelline				UPb		DOWNe / DOWNh				UPd
99	Uracil						DOWNg		DOWNk		DOWNd
100	Urea					UPa		UPc			DOWNd

## Sheet: Table S5
	CRC and adenomas vs controls		Behavior
#	Common Name	No. of articles	up	down	equal	Vote-counting	Total N	Comparison	Reference	Country
1	Creatinine	2	0	2	0	-2	343	CRC/advanced adenoma_controls; CRC/controls	(Kim ER et al., 2019)(Wang Z et al., 2017)	CN, KR
2	Hippuric acid	2	0	2	0	-2	343	CRC/advanced adenoma_controls; CRC/controls	(Kim ER et al., 2019)(Wang Z et al., 2017)	CN, KR
3	Choline	2	1	1	0	0	151	CRC pre-surgery/controls; CRC/controls	(Li Z et al., 2022)(Wang Z et al., 2017)	CN, CN
4	L-Alanine	2	1	1	0	0	343	CRC/advanced adenoma_controls; CRC/controls	(Kim ER et al., 2019)(Wang Z et al., 2017)	CN, KR
5	4-Hydroxybenzoic acid	1	0	1	0	-1	56	CRC pre-surgery/controls	(Li Z et al., 2022)	CN
6	Acetone	1	0	1	0	-1	988	CRC_adenomas_hiperplastics/Controls	(Eisner R et al., 2013)	CA
7	Ascorbic acid	1	0	1	0	-1	933	CRC/advanced adenoma_controls; CRC/advanced adenoma_controls	(Kim ER et al., 2019)	KR
8	beta-Hydroxyisovaleric acid	1	0	1	0	-1	56	CRC pre-surgery/controls	(Li Z et al., 2022)	CN
9	Citric acid	1	0	1	0	-1	248	CRC/advanced adenoma_controls; CRC/controls	(Kim ER et al., 2019)	KR
10	Dimethyl sulfone	1	0	1	0	-1	95	CRC/controls	(Wang Z et al., 2017)	CN
11	Glycerol	1	0	1	0	-1	248	CRC/advanced adenoma_controls	(Kim ER et al., 2019)	KR
12	Isocitric acid	1	0	1	0	-1	95	CRC/controls	(Wang Z et al., 2017)	CN
13	L-Asparagine	1	0	1	0	-1	95	CRC/controls	(Wang Z et al., 2017)	CN
14	L-Cysteine	1	0	1	0	-1	95	CRC/controls	(Wang Z et al., 2017)	CN
15	L-Histidine	1	0	1	0	-1	56	CRC pre-surgery/controls	(Li Z et al., 2022)	CN
16	L-Phenylalanine	1	0	1	0	-1	95	CRC/controls	(Wang Z et al., 2017)	CN
17	L-Threonine	1	0	1	0	-1	248	CRC/advanced adenoma_controls	(Kim ER et al., 2019)	KR
18	Methylamine	1	0	1	0	-1	95	CRC/controls	(Wang Z et al., 2017)	CN
19	N-Methyl-L-histidine	1	0	1	0	-1	56	CRC pre-surgery/controls	(Li Z et al., 2022)	CN
20	3-Aminoisobutyrate	1	1	0	0	1	248	CRC/advanced adenoma_controls	(Kim ER et al., 2019)	KR
21	4-Hydroxyphenylacetic acid	1	1	0	0	1	56	CRC pre-surgery/controls	(Li Z et al., 2022)	CN
22	Acetic Acid	1	1	0	0	1	56	CRC pre-surgery/controls	(Li Z et al., 2022)	CN
23	Acetoacetic acid	1	1	0	0	1	95	CRC/controls	(Wang Z et al., 2017)	CN
24	cis-Aconitic acid	1	1	0	0	1	95	CRC/controls	(Wang Z et al., 2017)	CN
25	Creatine	1	1	0	0	1	56	CRC pre-surgery/controls	(Li Z et al., 2022)	CN
26	D-Xylose	1	1	0	0	1	56	CRC pre-surgery/controls	(Li Z et al., 2022)	CN
27	Formic acid	1	1	0	0	1	56	CRC pre-surgery/controls	(Li Z et al., 2022)	CN
28	Glycocyamine	1	1	0	0	1	95	CRC/controls	(Wang Z et al., 2017)	CN
29	L-Glutamine	1	1	0	0	1	95	CRC/controls	(Wang Z et al., 2017)	CN
30	L-Homocysteine	1	1	0	0	1	95	CRC/controls	(Wang Z et al., 2017)	CN
31	L-Tyrosine	1	1	0	0	1	988	CRC_adenomas_hiperplastics/Controls	(Eisner R et al., 2013)	CA
32	L-Valine	1	1	0	0	1	248	CRC/advanced adenoma_controls	(Kim ER et al., 2019)	KR
33	Methanol	1	1	0	0	1	56	CRC pre-surgery/controls	(Li Z et al., 2022)	CN
34	Phenylacetylglutamine	1	1	0	0	1	56	CRC pre-surgery/controls	(Li Z et al., 2022)	CN
35	Propylene glycol	1	1	0	0	1	56	CRC pre-surgery/controls	(Li Z et al., 2022)	CN
36	Succinic acid	1	1	0	0	1	56	CRC pre-surgery/controls	(Li Z et al., 2022)	CN
37	Taurine	1	1	0	0	1	248	CRC/advanced adenoma_controls	(Kim ER et al., 2019)	KR
38	trans-Aconitic acid	1	1	0	0	1	95	CRC/controls	(Wang Z et al., 2017)	CN
39	Trigonelline	1	1	0	0	1	988	CRC_adenomas_hiperplastics/Controls	(Eisner R et al., 2013)	CA
40	Urea	1	1	0	0	1	248	CRC/advanced adenoma_controls; CRC/controls	(Kim ER et al., 2019)	KR

## Sheet: Table S6
	CRC pre-/post-surgery		Behavior
#	Common Name	No. of articles	up	down	equal	Vote-counting	Total N	Comparison	Reference	Country
1	Carnitine	2	0	2	0	-2	191	CRC_pre-surgery/post-surgery; CRC_pre-surgery/post-surgery_w/chemotherapy	(Li Z et al., 2022)(Liesenfeld DB et al., 2015)	CN, DE
2	D-Glucose	2	0	2	0	-2	112	CRC_pre-surgery/post-surgery; CRC_pre-surgery/post-surgery_w/chemotherapy	(Li Z et al., 2022)(Li Z et al., 2022)	CN, CN
3	L-Lysine	2	0	2	0	-2	112	CRC_pre-surgery/post-surgery; CRC_pre-surgery/post-surgery_w/chemotherapy	(Li Z et al., 2022)(Li Z et al., 2022)	CN, CN
4	Pyruvic acid	2	0	2	0	-2	191	CRC_pre-surgery/post-surgery; CRC_pre-surgery/post-surgery_w/chemotherapy	(Li Z et al., 2022)(Liesenfeld DB et al., 2015)	CN, DE
5	Succinic acid	2	1	1	0	0	191	CRC_pre-surgery/post-surgery; CRC_pre-surgery/post-surgery_w/chemotherapy	(Li Z et al., 2022)(Liesenfeld DB et al., 2015)	CN, DE
6	trans-Aconitic acid	2	1	1	0	0	191	CRC_pre-surgery/post-surgery; CRC_pre-surgery/post-surgery_w/chemotherapy	(Li Z et al., 2022)(Liesenfeld DB et al., 2015)	CN, DE
7	2,3-Butanediol	1	0	1	0	-1	135	CRC_pre-surgery/post-surgery	(Liesenfeld DB et al., 2015)	DE
8	2,3-Dihydroxybutanoic acid	1	1	0	0	1	135	CRC_pre-surgery/post-surgery	(Liesenfeld DB et al., 2015)	DE
9	2-Aminobutyrate	1	1	0	0	1	135	CRC_pre-surgery/post-surgery	(Liesenfeld DB et al., 2015)	DE
10	2-Hydroxybutyric acid	1	1	0	0	1	56	CRC_pre-surgery/post-surgery	(Li Z et al., 2022)	CN
11	2-Hydroxyglutaric acid	1	1	0	0	1	135	CRC_pre-surgery/post-surgery	(Liesenfeld DB et al., 2015)	DE
12	2-O-(alpha-D-glucopyranosyl)glycerol	1	0	1	0	-1	135	CRC_pre-surgery/post-surgery	(Liesenfeld DB et al., 2015)	DE
13	3,4-Dihydroxybutanoic acid	1	0	1	0	-1	135	CRC_pre-surgery/post-surgery	(Liesenfeld DB et al., 2015)	DE
14	3-Aminoisobutyrate	1	0	1	0	-1	56	CRC_pre-surgery/post-surgery	(Li Z et al., 2022)	CN
15	3-Hydroxybutyric acid	1	0	1	0	-1	56	CRC_pre-surgery/post-surgery	(Li Z et al., 2022)	CN
16	3-Hydroxyhippuric acid	1	0	1	0	-1	135	CRC_pre-surgery/post-surgery	(Liesenfeld DB et al., 2015)	DE
17	3-Hydroxyisobutyric acid	1	1	0	0	1	135	CRC_pre-surgery/post-surgery	(Liesenfeld DB et al., 2015)	DE
18	3-Phosphoglycerate	1	0	1	0	-1	135	CRC_pre-surgery/post-surgery	(Liesenfeld DB et al., 2015)	DE
19	4-Hydroxybenzoic acid	1	0	1	0	-1	56	CRC_pre-surgery/post-surgery	(Li Z et al., 2022)	CN
20	4-Hydroxyhippuric acid	1	0	1	0	-1	135	CRC_pre-surgery/post-surgery	(Liesenfeld DB et al., 2015)	DE
21	Acetic Acid	1	1	0	0	1	56	CRC_pre-surgery/post-surgery	(Li Z et al., 2022)	CN
22	Acetone	1	0	1	0	-1	56	CRC_pre-surgery/post-surgery	(Li Z et al., 2022)	CN
23	Betaine	1	0	1	0	-1	56	CRC_pre-surgery/post-surgery	(Li Z et al., 2022)	CN
24	Creatinine	1	0	1	0	-1	56	CRC_pre-surgery/post-surgery	(Li Z et al., 2022)	CN
25	Ethanolamine	1	1	0	0	1	56	CRC_pre-surgery/post-surgery	(Li Z et al., 2022)	CN
26	Formic acid	1	0	1	0	-1	56	CRC_pre-surgery/post-surgery	(Li Z et al., 2022)	CN
27	Galactaric acid	1	1	0	0	1	135	CRC_pre-surgery/post-surgery	(Liesenfeld DB et al., 2015)	DE
28	gamma-Glutamylvaline	1	1	0	0	1	135	CRC_pre-surgery/post-surgery	(Liesenfeld DB et al., 2015)	DE
29	Gluconic acid	1	0	1	0	-1	135	CRC_pre-surgery/post-surgery	(Liesenfeld DB et al., 2015)	DE
30	Glycine	1	0	1	0	-1	56	CRC_pre-surgery/post-surgery	(Li Z et al., 2022)	CN
31	Hydroquinone	1	0	1	0	-1	135	CRC_pre-surgery/post-surgery	(Liesenfeld DB et al., 2015)	DE
32	Hydroxyprolyl-Hydroxyproline	1	1	0	0	1	135	CRC_pre-surgery/post-surgery	(Liesenfeld DB et al., 2015)	DE
33	Indole-3-acetic acid	1	0	1	0	-1	135	CRC_pre-surgery/post-surgery	(Liesenfeld DB et al., 2015)	DE
34	Indoxyl sulfate	1	1	0	0	1	56	CRC_pre-surgery/post-surgery	(Li Z et al., 2022)	CN
35	Inositol	1	0	1	0	-1	135	CRC_pre-surgery/post-surgery	(Liesenfeld DB et al., 2015)	DE
36	Lactic acid	1	0	1	0	-1	56	CRC_pre-surgery/post-surgery	(Li Z et al., 2022)	CN
37	L-Alanine	1	0	1	0	-1	56	CRC_pre-surgery/post-surgery	(Li Z et al., 2022)	CN
38	L-Arabinose	1	0	1	0	-1	135	CRC_pre-surgery/post-surgery	(Liesenfeld DB et al., 2015)	DE
39	L-Glutamine	1	0	1	0	-1	56	CRC_pre-surgery/post-surgery	(Li Z et al., 2022)	CN
40	L-Isoleucine	1	1	0	0	1	135	CRC_pre-surgery/post-surgery	(Liesenfeld DB et al., 2015)	DE
41	L-Threonine	1	0	1	0	-1	135	CRC_pre-surgery/post-surgery	(Liesenfeld DB et al., 2015)	DE
42	L-Tryptophan	1	0	1	0	-1	135	CRC_pre-surgery/post-surgery	(Liesenfeld DB et al., 2015)	DE
43	L-Tyrosine	1	0	1	0	-1	135	CRC_pre-surgery/post-surgery	(Liesenfeld DB et al., 2015)	DE
44	Maleamic acid	1	0	1	0	-1	135	CRC_pre-surgery/post-surgery	(Liesenfeld DB et al., 2015)	DE
45	Mannitol	1	0	1	0	-1	135	CRC_pre-surgery/post-surgery	(Liesenfeld DB et al., 2015)	DE
46	N-Methyl-L-histidine	1	1	0	0	1	56	CRC_pre-surgery/post-surgery	(Li Z et al., 2022)	CN
47	Oxalic acid	1	0	1	0	-1	135	CRC_pre-surgery/post-surgery	(Liesenfeld DB et al., 2015)	DE
48	p-Cresol	1	1	0	0	1	135	CRC_pre-surgery/post-surgery	(Liesenfeld DB et al., 2015)	DE
49	P-Cresol glucoronide	1	1	0	0	1	135	CRC_pre-surgery/post-surgery	(Liesenfeld DB et al., 2015)	DE
50	Phenylacetylglutamine	1	1	0	0	1	56	CRC_pre-surgery/post-surgery	(Li Z et al., 2022)	CN
51	Pyrogallol	1	0	1	0	-1	135	CRC_pre-surgery/post-surgery	(Liesenfeld DB et al., 2015)	DE
52	Pyrrole-2-carboxylic acid	1	0	1	0	-1	135	CRC_pre-surgery/post-surgery	(Liesenfeld DB et al., 2015)	DE
53	Tartaric acid	1	0	1	0	-1	135	CRC_pre-surgery/post-surgery	(Liesenfeld DB et al., 2015)	DE
54	Uracil	1	0	1	0	-1	56	CRC_pre-surgery/post-surgery	(Li Z et al., 2022)	CN
55	Urea	1	1	0	0	1	135	CRC_pre-surgery/post-surgery	(Liesenfeld DB et al., 2015)	DE

## Sheet: Table S7
	Vote counting (CRC and adenomas vs controls) and (CRC pre-/post-surgery)		Behavior
#	Common Name	No. of articles	up	down	equal	Vote-counting	Total N	Comparison	Reference	Country
1	Creatinine	3	0	3	0	-3	399	CRC/advanced adenoma_controls; CRC/controls; CRC_pre-surgery/post-surgery	(Kim ER et al., 2019)(Wang Z et al., 2017)(Li Z et al., 2022)	CN, CN, KR
2	4-Hydroxybenzoic acid	2	0	2	0	-2	112	CRC pre-surgery/controls; CRC_pre-surgery/post-surgery	(Li Z et al., 2022)(Li Z et al., 2022)	CN, CN
3	Acetone	2	0	2	0	-2	1044	CRC_adenomas_hiperplastics/Controls; CRC_pre-surgery/post-surgery	(Eisner R et al., 2013)(Li Z et al., 2022)	CA, CN
4	Carnitine	2	0	2	0	-2	191	CRC_pre-surgery/post-surgery; CRC_pre-surgery/post-surgery_w/chemotherapy	(Li Z et al., 2022)(Liesenfeld DB et al., 2015)	CN, DE
5	D-Glucose	2	0	2	0	-2	112	CRC_pre-surgery/post-surgery; CRC_pre-surgery/post-surgery_w/chemotherapy	(Li Z et al., 2022)(Li Z et al., 2022)	CN, CN
6	Hippuric acid	2	0	2	0	-2	343	CRC/advanced adenoma_controls; CRC/controls	(Kim ER et al., 2019)(Wang Z et al., 2017)	CN, KR
7	L-Lysine	2	0	2	0	-2	112	CRC_pre-surgery/post-surgery; CRC_pre-surgery/post-surgery_w/chemotherapy	(Li Z et al., 2022)(Li Z et al., 2022)	CN, CN
8	L-Threonine	2	0	2	0	-2	383	CRC/advanced adenoma_controls; CRC_pre-surgery/post-surgery	(Kim ER et al., 2019)(Liesenfeld DB et al., 2015)	DE, KR
9	Pyruvic acid	2	0	2	0	-2	191	CRC_pre-surgery/post-surgery; CRC_pre-surgery/post-surgery_w/chemotherapy	(Li Z et al., 2022)(Liesenfeld DB et al., 2015)	CN, DE
10	L-Alanine	3	1	2	0	-1	399	CRC/advanced adenoma_controls; CRC/controls; CRC_pre-surgery/post-surgery	(Kim ER et al., 2019)(Wang Z et al., 2017)(Li Z et al., 2022)	CN, CN, KR
11	Choline	2	1	1	0	0	151	CRC pre-surgery/controls; CRC/controls	(Li Z et al., 2022)(Wang Z et al., 2017)	CN, CN
12	3-Aminoisobutyrate	2	1	1	0	0	304	CRC/advanced adenoma_controls; CRC_pre-surgery/post-surgery	(Kim ER et al., 2019)(Li Z et al., 2022)	CN, KR
13	Formic acid	2	1	1	0	0	112	CRC pre-surgery/controls; CRC_pre-surgery/post-surgery	(Li Z et al., 2022)(Li Z et al., 2022)	CN, CN
14	L-Glutamine	2	1	1	0	0	151	CRC/controls; CRC_pre-surgery/post-surgery	(Wang Z et al., 2017)(Li Z et al., 2022)	CN, CN
15	L-Tyrosine	2	1	1	0	0	1123	CRC_adenomas_hiperplastics/Controls; CRC_pre-surgery/post-surgery	(Eisner R et al., 2013)(Liesenfeld DB et al., 2015)	CA, DE
16	N-Methyl-L-histidine	2	1	1	0	0	112	CRC pre-surgery/controls; CRC_pre-surgery/post-surgery	(Li Z et al., 2022)(Li Z et al., 2022)	CN, CN
17	Succinic acid	3	2	1	0	1	247	CRC pre-surgery/controls; CRC_pre-surgery/post-surgery; CRC_pre-surgery/post-surgery_w/chemotherapy	(Li Z et al., 2022)(Li Z et al., 2022)(Liesenfeld DB et al., 2015)	CN, CN, DE
18	trans-Aconitic acid	3	2	1	0	1	286	CRC/controls; CRC_pre-surgery/post-surgery; CRC_pre-surgery/post-surgery_w/chemotherapy	(Wang Z et al., 2017)(Li Z et al., 2022)(Liesenfeld DB et al., 2015)	CN, CN, DE
19	Acetic Acid	2	2	0	0	2	112	CRC pre-surgery/controls; CRC_pre-surgery/post-surgery	(Li Z et al., 2022)(Li Z et al., 2022)	CN, CN
20	Phenylacetylglutamine	2	2	0	0	2	112	CRC pre-surgery/controls; CRC_pre-surgery/post-surgery	(Li Z et al., 2022)(Li Z et al., 2022)	CN, CN
21	Urea	2	2	0	0	2	383	CRC/advanced adenoma_controls; CRC/controls; CRC_pre-surgery/post-surgery	(Kim ER et al., 2019)(Liesenfeld DB et al., 2015)	DE, KR
22	2,3-Butanediol	1	0	1	0	-1	135	CRC_pre-surgery/post-surgery	(Liesenfeld DB et al., 2015)	DE
23	2-O-(alpha-D-glucopyranosyl)glycerol	1	0	1	0	-1	135	CRC_pre-surgery/post-surgery	(Liesenfeld DB et al., 2015)	DE
24	3,4-Dihydroxybutanoic acid	1	0	1	0	-1	135	CRC_pre-surgery/post-surgery	(Liesenfeld DB et al., 2015)	DE
25	3-Hydroxybutyric acid	1	0	1	0	-1	56	CRC_pre-surgery/post-surgery	(Li Z et al., 2022)	CN
26	3-Hydroxyhippuric acid	1	0	1	0	-1	135	CRC_pre-surgery/post-surgery	(Liesenfeld DB et al., 2015)	DE
27	3-Phosphoglycerate	1	0	1	0	-1	135	CRC_pre-surgery/post-surgery	(Liesenfeld DB et al., 2015)	DE
28	4-Hydroxyhippuric acid	1	0	1	0	-1	135	CRC_pre-surgery/post-surgery	(Liesenfeld DB et al., 2015)	DE
29	Ascorbic acid	1	0	1	0	-1	933	CRC/advanced adenoma_controls; CRC/advanced adenoma_controls	(Kim ER et al., 2019)	KR
30	beta-Hydroxyisovaleric acid	1	0	1	0	-1	56	CRC pre-surgery/controls	(Li Z et al., 2022)	CN
31	Betaine	1	0	1	0	-1	56	CRC_pre-surgery/post-surgery	(Li Z et al., 2022)	CN
32	Citric acid	1	0	1	0	-1	248	CRC/advanced adenoma_controls; CRC/controls	(Kim ER et al., 2019)	KR
33	Dimethyl sulfone	1	0	1	0	-1	95	CRC/controls	(Wang Z et al., 2017)	CN
34	Gluconic acid	1	0	1	0	-1	135	CRC_pre-surgery/post-surgery	(Liesenfeld DB et al., 2015)	DE
35	Glycerol	1	0	1	0	-1	248	CRC/advanced adenoma_controls	(Kim ER et al., 2019)	KR
36	Glycine	1	0	1	0	-1	56	CRC_pre-surgery/post-surgery	(Li Z et al., 2022)	CN
37	Hydroquinone	1	0	1	0	-1	135	CRC_pre-surgery/post-surgery	(Liesenfeld DB et al., 2015)	DE
38	Indole-3-acetic acid	1	0	1	0	-1	135	CRC_pre-surgery/post-surgery	(Liesenfeld DB et al., 2015)	DE
39	Inositol	1	0	1	0	-1	135	CRC_pre-surgery/post-surgery	(Liesenfeld DB et al., 2015)	DE
40	Isocitric acid	1	0	1	0	-1	95	CRC/controls	(Wang Z et al., 2017)	CN
41	Lactic acid	1	0	1	0	-1	56	CRC_pre-surgery/post-surgery	(Li Z et al., 2022)	CN
42	L-Arabinose	1	0	1	0	-1	135	CRC_pre-surgery/post-surgery	(Liesenfeld DB et al., 2015)	DE
43	L-Asparagine	1	0	1	0	-1	95	CRC/controls	(Wang Z et al., 2017)	CN
44	L-Cysteine	1	0	1	0	-1	95	CRC/controls	(Wang Z et al., 2017)	CN
45	L-Histidine	1	0	1	0	-1	56	CRC pre-surgery/controls	(Li Z et al., 2022)	CN
46	L-Phenylalanine	1	0	1	0	-1	95	CRC/controls	(Wang Z et al., 2017)	CN
47	L-Tryptophan	1	0	1	0	-1	135	CRC_pre-surgery/post-surgery	(Liesenfeld DB et al., 2015)	DE
48	Maleamic acid	1	0	1	0	-1	135	CRC_pre-surgery/post-surgery	(Liesenfeld DB et al., 2015)	DE
49	Mannitol	1	0	1	0	-1	135	CRC_pre-surgery/post-surgery	(Liesenfeld DB et al., 2015)	DE
50	Methylamine	1	0	1	0	-1	95	CRC/controls	(Wang Z et al., 2017)	CN
51	Oxalic acid	1	0	1	0	-1	135	CRC_pre-surgery/post-surgery	(Liesenfeld DB et al., 2015)	DE
52	Pyrogallol	1	0	1	0	-1	135	CRC_pre-surgery/post-surgery	(Liesenfeld DB et al., 2015)	DE
53	Pyrrole-2-carboxylic acid	1	0	1	0	-1	135	CRC_pre-surgery/post-surgery	(Liesenfeld DB et al., 2015)	DE
54	Tartaric acid	1	0	1	0	-1	135	CRC_pre-surgery/post-surgery	(Liesenfeld DB et al., 2015)	DE
55	Uracil	1	0	1	0	-1	56	CRC_pre-surgery/post-surgery	(Li Z et al., 2022)	CN
56	2,3-Dihydroxybutanoic acid	1	1	0	0	1	135	CRC_pre-surgery/post-surgery	(Liesenfeld DB et al., 2015)	DE
57	2-Aminobutyrate	1	1	0	0	1	135	CRC_pre-surgery/post-surgery	(Liesenfeld DB et al., 2015)	DE
58	2-Hydroxybutyric acid	1	1	0	0	1	56	CRC_pre-surgery/post-surgery	(Li Z et al., 2022)	CN
59	2-Hydroxyglutaric acid	1	1	0	0	1	135	CRC_pre-surgery/post-surgery	(Liesenfeld DB et al., 2015)	DE
60	3-Hydroxyisobutyric acid	1	1	0	0	1	135	CRC_pre-surgery/post-surgery	(Liesenfeld DB et al., 2015)	DE
61	4-Hydroxyphenylacetic acid	1	1	0	0	1	56	CRC pre-surgery/controls	(Li Z et al., 2022)	CN
62	Acetoacetic acid	1	1	0	0	1	95	CRC/controls	(Wang Z et al., 2017)	CN
63	cis-Aconitic acid	1	1	0	0	1	95	CRC/controls	(Wang Z et al., 2017)	CN
64	Creatine	1	1	0	0	1	56	CRC pre-surgery/controls	(Li Z et al., 2022)	CN
65	D-Xylose	1	1	0	0	1	56	CRC pre-surgery/controls	(Li Z et al., 2022)	CN
66	Ethanolamine	1	1	0	0	1	56	CRC_pre-surgery/post-surgery	(Li Z et al., 2022)	CN
67	Galactaric acid	1	1	0	0	1	135	CRC_pre-surgery/post-surgery	(Liesenfeld DB et al., 2015)	DE
68	gamma-Glutamylvaline	1	1	0	0	1	135	CRC_pre-surgery/post-surgery	(Liesenfeld DB et al., 2015)	DE
69	Glycocyamine	1	1	0	0	1	95	CRC/controls	(Wang Z et al., 2017)	CN
70	Hydroxyprolyl-Hydroxyproline	1	1	0	0	1	135	CRC_pre-surgery/post-surgery	(Liesenfeld DB et al., 2015)	DE
71	Indoxyl sulfate	1	1	0	0	1	56	CRC_pre-surgery/post-surgery	(Li Z et al., 2022)	CN
72	L-Homocysteine	1	1	0	0	1	95	CRC/controls	(Wang Z et al., 2017)	CN
73	L-Isoleucine	1	1	0	0	1	135	CRC_pre-surgery/post-surgery	(Liesenfeld DB et al., 2015)	DE
74	L-Valine	1	1	0	0	1	248	CRC/advanced adenoma_controls	(Kim ER et al., 2019)	KR
75	Methanol	1	1	0	0	1	56	CRC pre-surgery/controls	(Li Z et al., 2022)	CN
76	p-Cresol	1	1	0	0	1	135	CRC_pre-surgery/post-surgery	(Liesenfeld DB et al., 2015)	DE
77	P-Cresol glucoronide	1	1	0	0	1	135	CRC_pre-surgery/post-surgery	(Liesenfeld DB et al., 2015)	DE
78	Propylene glycol	1	1	0	0	1	56	CRC pre-surgery/controls	(Li Z et al., 2022)	CN
79	Taurine	1	1	0	0	1	248	CRC/advanced adenoma_controls	(Kim ER et al., 2019)	KR
80	Trigonelline	1	1	0	0	1	988	CRC_adenomas_hiperplastics/Controls	(Eisner R et al., 2013)	CA
